# Supplementary material for: Identification and distribution of the NBS-LRR gene family in the Cassava genome
Source: PubMed Central journal article supplement (PMC4422547; doi:10.1186/s12864-015-1554-9), 2015-05-07

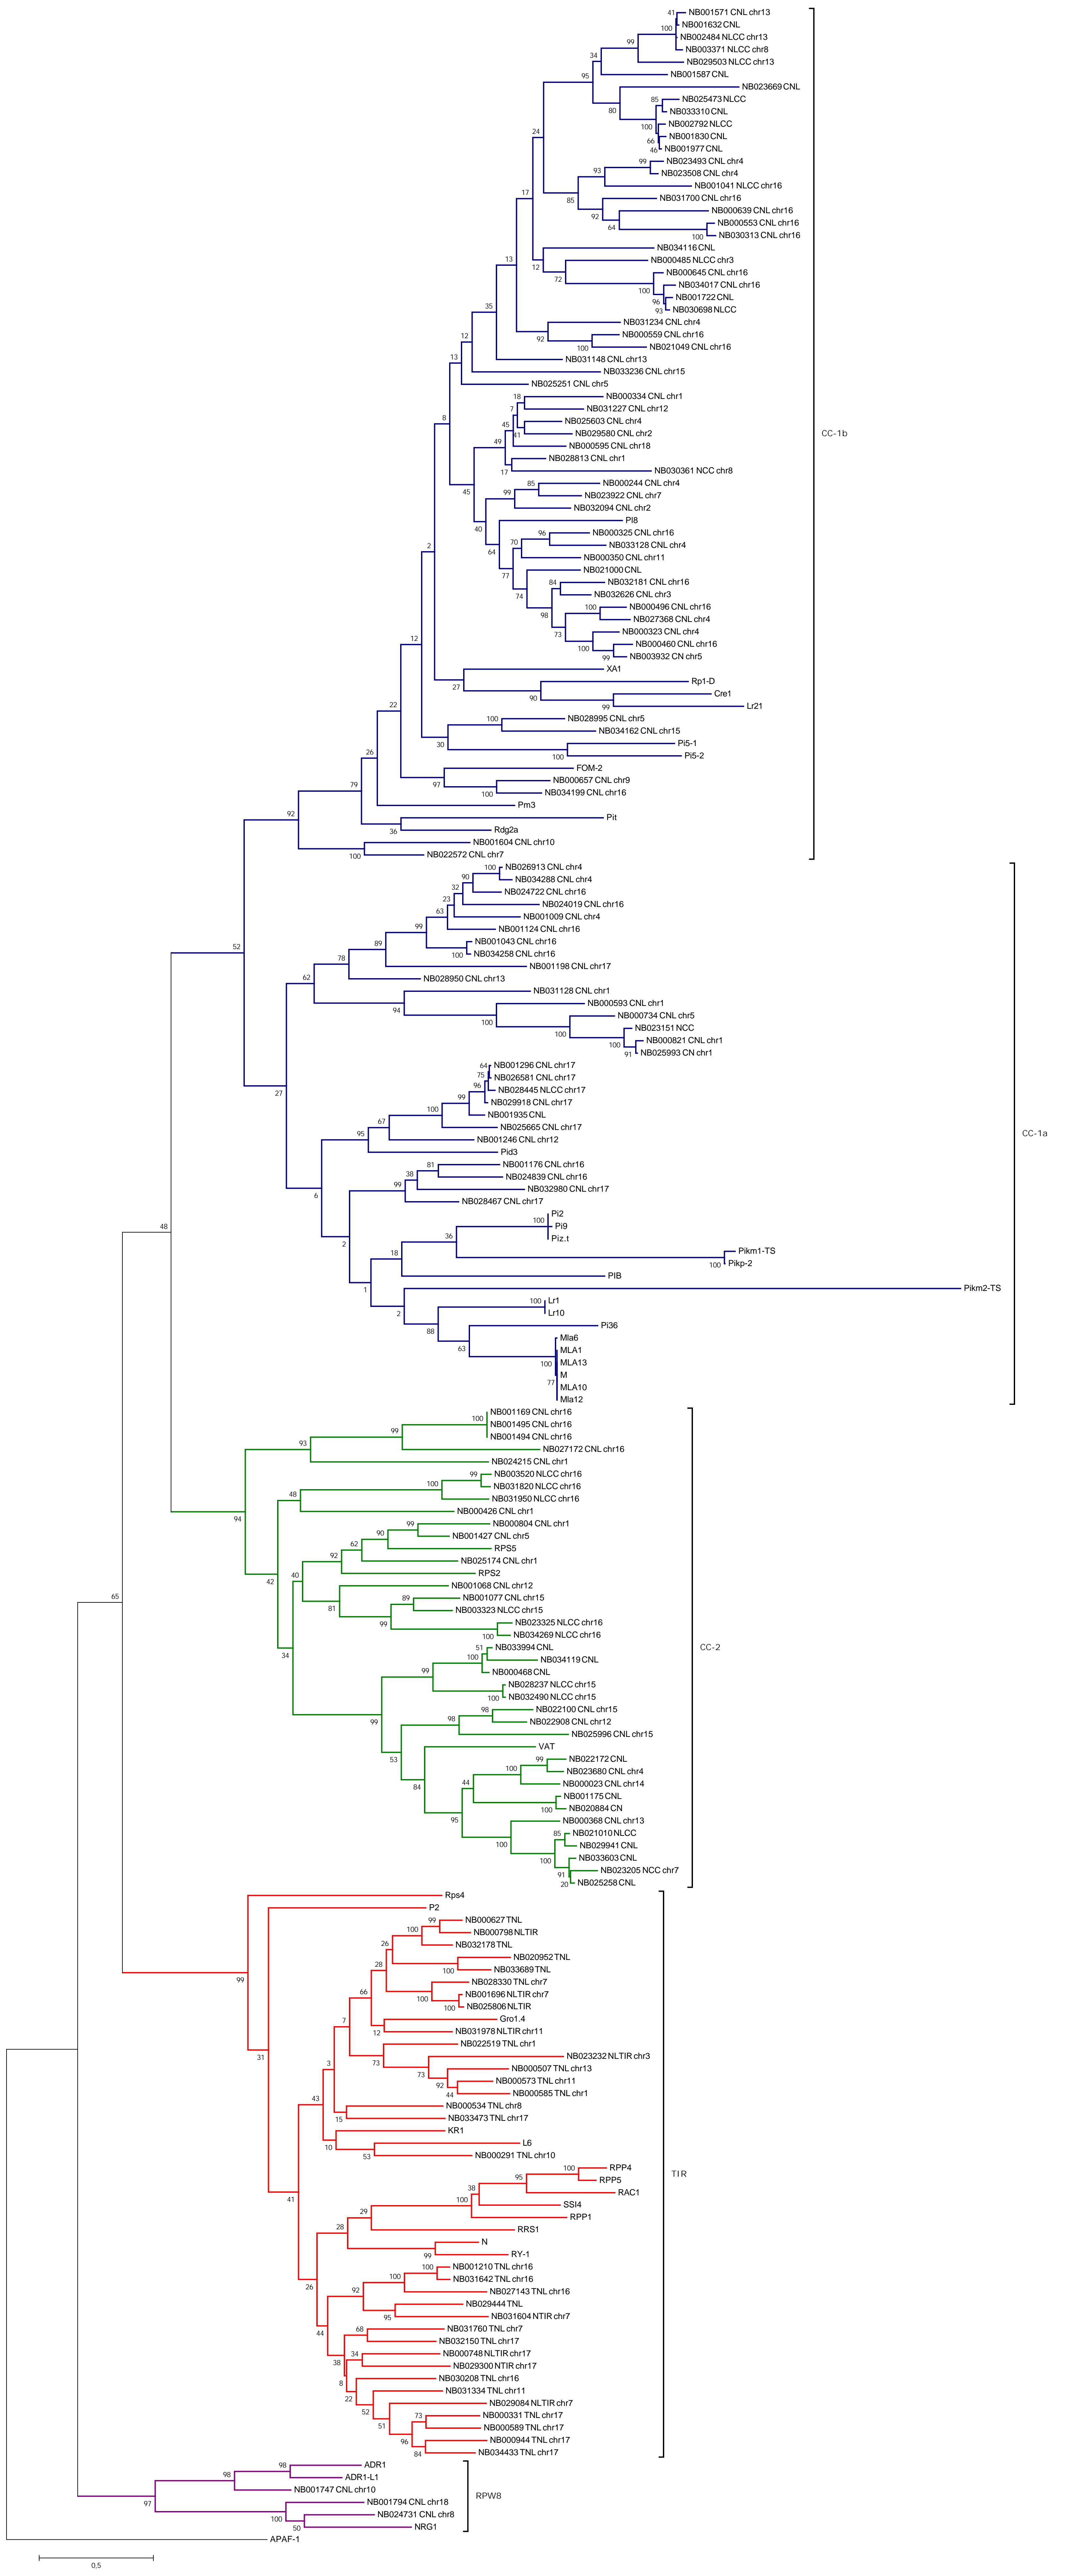

Supplement: 12864_2015_1554_MOESM6_ESM.pdf [file 12864_2015_1554_MOESM6_ESM.pdf]
